# Supplementary material for: Potent Tyrosinase Inhibitory Activity of Curcuminoid Analogues and Inhibition Kinetics Studies
Source: MDPI journal article supplement (doi:10.3390/cosmetics8020035), 2021-05-04
Supplement: s1 [file s1]

## Supplementary Materials

### **Potent tyrosinase inhibitory activity of curcuminoid analogues and inhibition kinetics studies**

Anan Athipornchai <sup>1</sup>, Nattisa Niyomtham <sup>2</sup>, Wachirachai Pabuprapap <sup>3</sup>, Vachiraporn Ajavakom <sup>3</sup>, Maria Duca <sup>4</sup>, Stéphane Azoulay <sup>4,\*</sup> and Apichart Suksamrarn <sup>3,\*</sup>

<sup>1</sup> Department of Chemistry and Center of Excellence for Innovation in Chemistry, Faculty of Science, Burapha University, Bangsaen, Chonburi 20131, Thailand; anana@burapha.ac.th

<sup>2</sup> International College of Dentistry, Walailak University, Nakhon Si Thammarat 80161, Thailand; nattisa.n@hotmail.com

<sup>3</sup> Department of Chemistry and Center of Excellence for Innovation in Chemistry, Faculty of Science, Ramkhamhaeng University, Bangkok, Bangkok 10240, Thailand; wachirachai7@gmail.com (W.P.); satcharoen@yahoo.com (V.A.)

<sup>4</sup> Université Côte d'Azur, CNRS, ICN, 28 Avenue Valrose, 06108 Nice, CEDEX 2, France; maria.duca@univ-cotedazur.fr

\* Correspondence: asuksamrarn@yahoo.com; s\_apichart@ru.ac.th; Tel.: +66 81849 8420 (A.S.); stephane.azoulay@univ-cotedazur.fr; Tel.: +33 4 89 15 10 29 (S.A.)

## Table of Contents

| Figure     | Description                                                                                                                          | Page |
|------------|--------------------------------------------------------------------------------------------------------------------------------------|------|
| Figure S1  | <sup>1</sup> H NMR spectrum of curcumin ( <b>1</b> ) (CDCl <sub>3</sub> ).....                                                       | 3    |
| Figure S2  | <sup>13</sup> C NMR spectrum of curcumin ( <b>1</b> ) (CDCl <sub>3</sub> ).....                                                      | 3    |
| Figure S3  | <sup>1</sup> H NMR spectrum of demethoxycurcumin ( <b>2</b> ) (CDCl <sub>3</sub> ).....                                              | 4    |
| Figure S4  | <sup>13</sup> C NMR spectrum of demethoxycurcumin ( <b>2</b> ) (CDCl <sub>3</sub> ).....                                             | 4    |
| Figure S5  | <sup>1</sup> H NMR spectrum of bisdemethoxycurcumin ( <b>3</b> ) (CDCl <sub>3</sub> +10 drops of CD <sub>3</sub> OD).....            | 5    |
| Figure S6  | <sup>13</sup> C NMR spectrum of bisdemethoxycurcumin ( <b>3</b> ) (CDCl <sub>3</sub> +10 drops of CD <sub>3</sub> OD).....           | 5    |
| Figure S7  | <sup>1</sup> H NMR spectrum of di- <i>O</i> -acetylcurcumin ( <b>4</b> ) (CDCl <sub>3</sub> ).....                                   | 6    |
| Figure S8  | <sup>13</sup> C NMR spectrum of di- <i>O</i> -acetylcurcumin ( <b>4</b> ) (CDCl <sub>3</sub> ).....                                  | 6    |
| Figure S9  | <sup>1</sup> H NMR spectrum of di- <i>O</i> -methylcurcumin ( <b>5</b> ) (CDCl <sub>3</sub> ).....                                   | 7    |
| Figure S10 | <sup>13</sup> C NMR spectrum of di- <i>O</i> -methylcurcumin ( <b>5</b> ) (CDCl <sub>3</sub> ).....                                  | 7    |
| Figure S11 | <sup>1</sup> H NMR spectrum of di- <i>O</i> -(2-hydroxyethyl)curcumin ( <b>6</b> ) (CD <sub>3</sub> OD).....                         | 8    |
| Figure S12 | <sup>13</sup> C NMR spectrum of di- <i>O</i> -(2-hydroxyethyl)curcumin ( <b>6</b> ) (CD <sub>3</sub> OD).....                        | 8    |
| Figure S13 | <sup>1</sup> H NMR spectrum of di- <i>O</i> -demethylcurcumin ( <b>7</b> ) (CDCl <sub>3</sub> +10 drops of CD <sub>3</sub> OD).....  | 9    |
| Figure S14 | <sup>13</sup> C NMR spectrum of di- <i>O</i> -demethylcurcumin ( <b>7</b> ) (CDCl <sub>3</sub> +10 drops of CD <sub>3</sub> OD)..... | 9    |
| Figure S15 | <sup>1</sup> H NMR spectrum of curcumin pyrazole ( <b>8</b> ) (CD <sub>3</sub> OD).....                                              | 10   |
| Figure S16 | <sup>13</sup> C NMR spectrum of curcumin pyrazole ( <b>8</b> ) (CD <sub>3</sub> OD).....                                             | 10   |
| Figure S17 | <sup>1</sup> H NMR spectrum of demethoxycurcumin pyrazole ( <b>9</b> ) (CD <sub>3</sub> OD).....                                     | 11   |
| Figure S18 | <sup>13</sup> C NMR spectrum of demethoxycurcumin pyrazole ( <b>9</b> ) (CD <sub>3</sub> OD).....                                    | 11   |
| Figure S19 | <sup>1</sup> H NMR spectrum of bisdemethoxycurcumin pyrazole ( <b>10</b> ) (CD <sub>3</sub> OD).....                                 | 12   |
| Figure S20 | <sup>13</sup> C NMR spectrum of bisdemethoxycurcumin pyrazole ( <b>10</b> ) (CD <sub>3</sub> OD).....                                | 12   |
| Figure S21 | <sup>1</sup> H NMR spectrum of curcumin isoxazole ( <b>11</b> ) (CD <sub>3</sub> OD).....                                            | 13   |
| Figure S22 | <sup>13</sup> C NMR spectrum of curcumin isoxazole ( <b>11</b> ) (CD <sub>3</sub> OD).....                                           | 13   |
| Figure S23 | <sup>1</sup> H NMR spectrum of bisdemethoxycurcumin isoxazole ( <b>12</b> ) (CD <sub>3</sub> OD).....                                | 14   |
| Figure S24 | <sup>13</sup> C NMR spectrum of bisdemethoxycurcumin isoxazole ( <b>12</b> ) (CD <sub>3</sub> OD).....                               | 14   |
| Figure S25 | <sup>1</sup> H NMR spectrum of di- <i>O</i> -methylcurcumin isoxazole ( <b>13</b> ) (CD <sub>3</sub> OD).....                        | 15   |
| Figure S26 | <sup>13</sup> C NMR spectrum of di- <i>O</i> -methylcurcumin isoxazole ( <b>13</b> ) (CD <sub>3</sub> OD).....                       | 15   |
| Figure S27 | <sup>1</sup> H NMR spectrum di- <i>O</i> -acetylcurcumin isoxazole ( <b>14</b> ) (CD <sub>3</sub> OD).....                           | 16   |
| Figure S28 | <sup>13</sup> C NMR spectrum of di- <i>O</i> -acetylcurcumin isoxazole ( <b>14</b> ) (CD <sub>3</sub> OD).....                       | 16   |
| Figure S29 | <sup>1</sup> H NMR spectrum of tetrahydrocurcumin ( <b>15</b> ) (CDCl <sub>3</sub> ).....                                            | 17   |
| Figure S30 | <sup>13</sup> C NMR spectrum of tetrahydrocurcumin ( <b>15</b> ) (CDCl <sub>3</sub> ).....                                           | 17   |
| Figure S31 | <sup>1</sup> H NMR spectrum of hexahydrocurcumin ( <b>16</b> ) (CDCl <sub>3</sub> ).....                                             | 18   |
| Figure S32 | <sup>13</sup> C NMR spectrum of hexahydrocurcumin ( <b>16</b> ) (CDCl <sub>3</sub> ).....                                            | 18   |
| Figure S33 | <sup>1</sup> H NMR spectrum of 1,7-bis(4-hydroxy-3-methoxyphenyl)hept-4-en-3-one ( <b>17</b> ) (CDCl <sub>3</sub> ).....             | 19   |
| Figure S34 | <sup>13</sup> C NMR spectrum of 1,7-bis(4-hydroxy-3-methoxyphenyl)hept-4-en-3-one ( <b>17</b> ) (CDCl <sub>3</sub> ).....            | 19   |

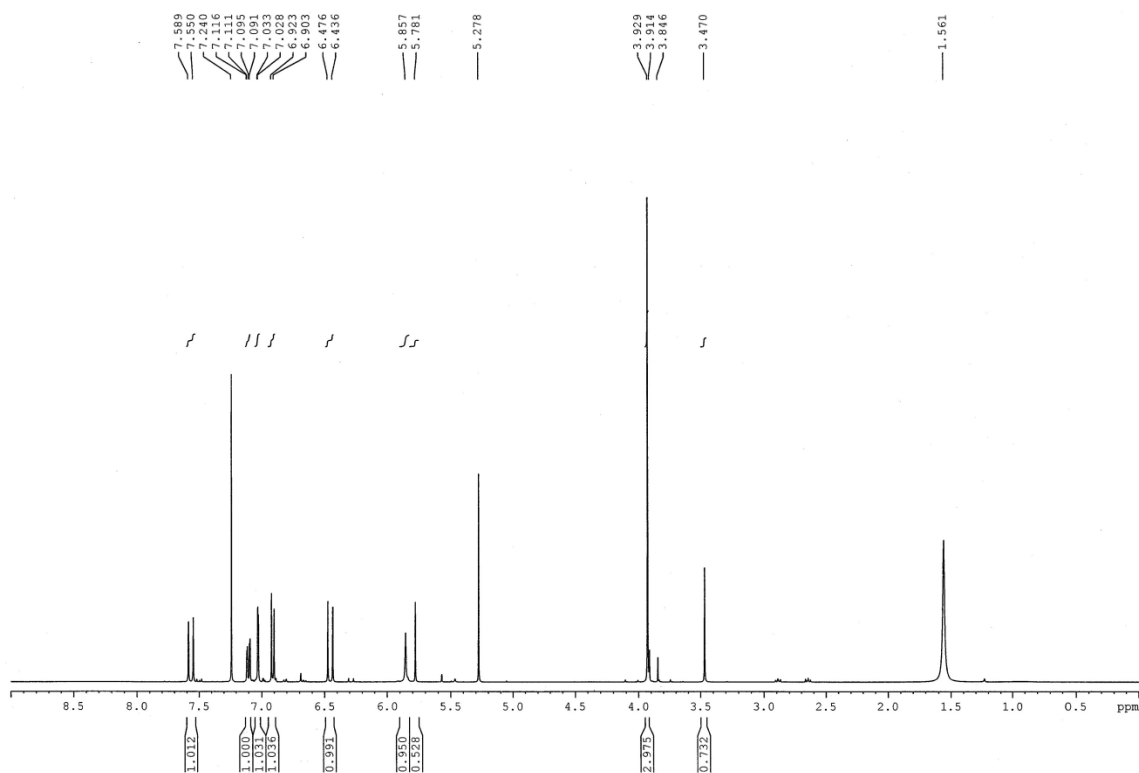

Figure S1 <sup>1</sup>H NMR spectrum of curcumin (1) (CDCl<sub>3</sub>)

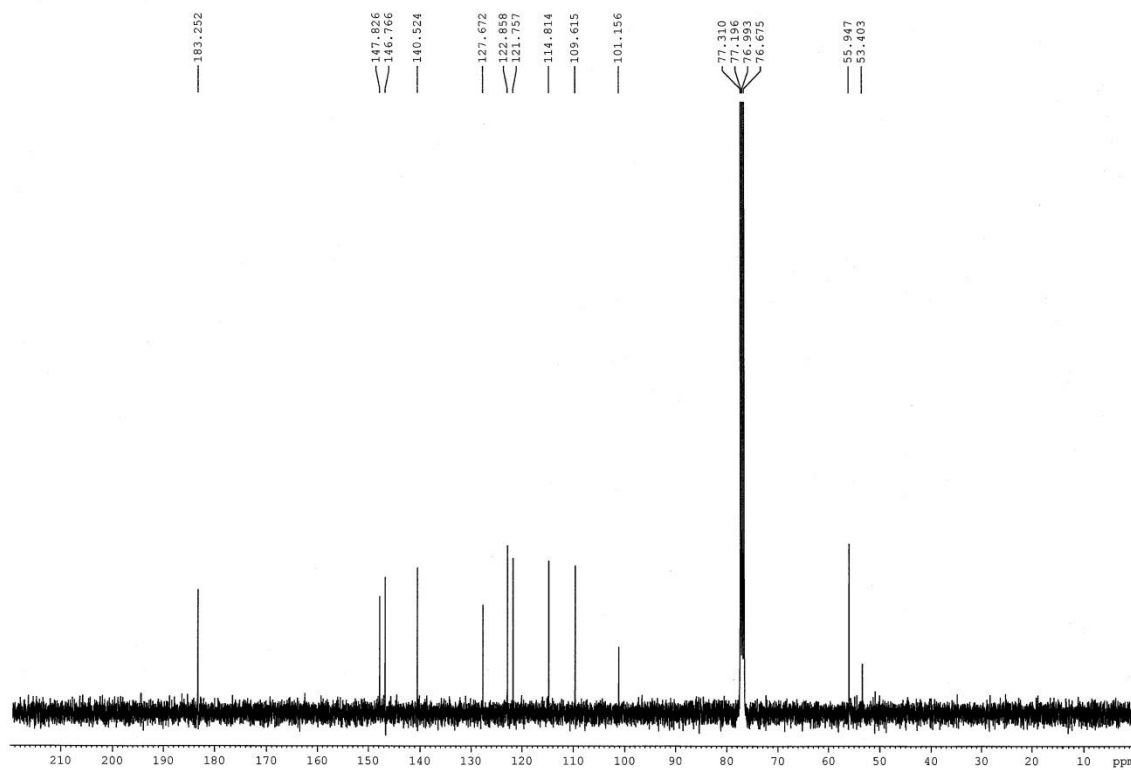

Figure S2 <sup>13</sup>C NMR spectrum of curcumin (1) (CDCl<sub>3</sub>)

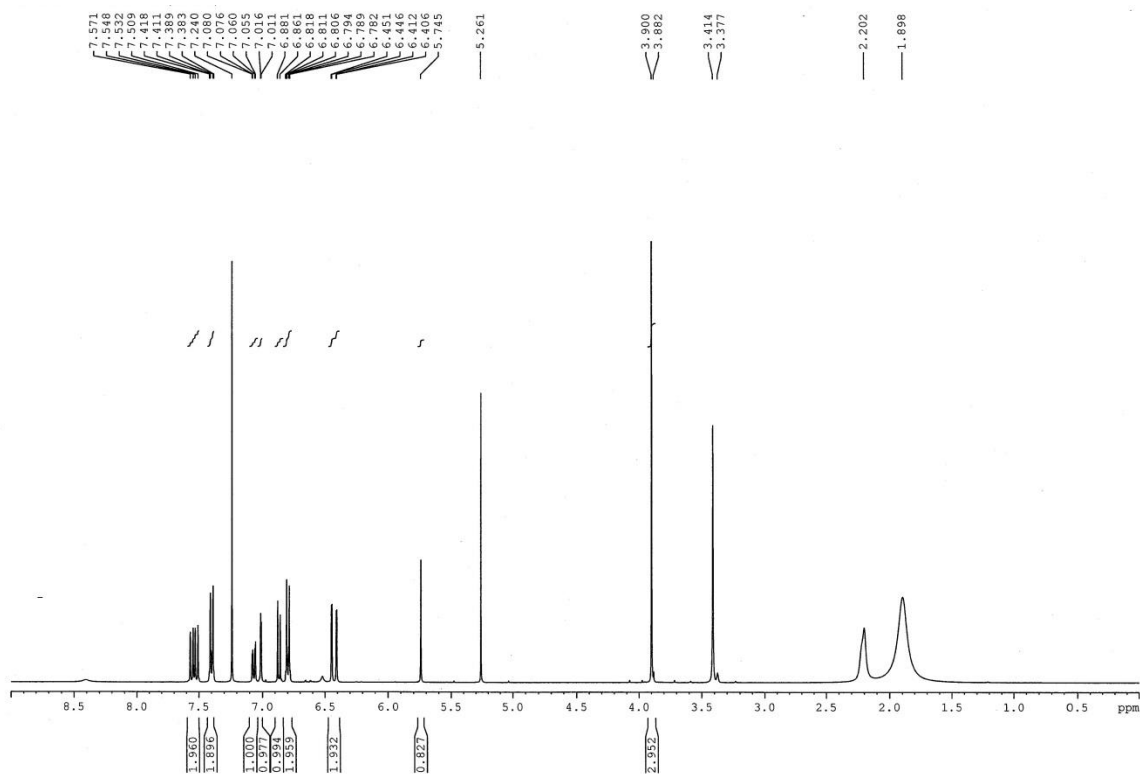

Figure S3 <sup>1</sup>H NMR spectrum of demethoxycurcumin (**2**) (CDCl<sub>3</sub>)

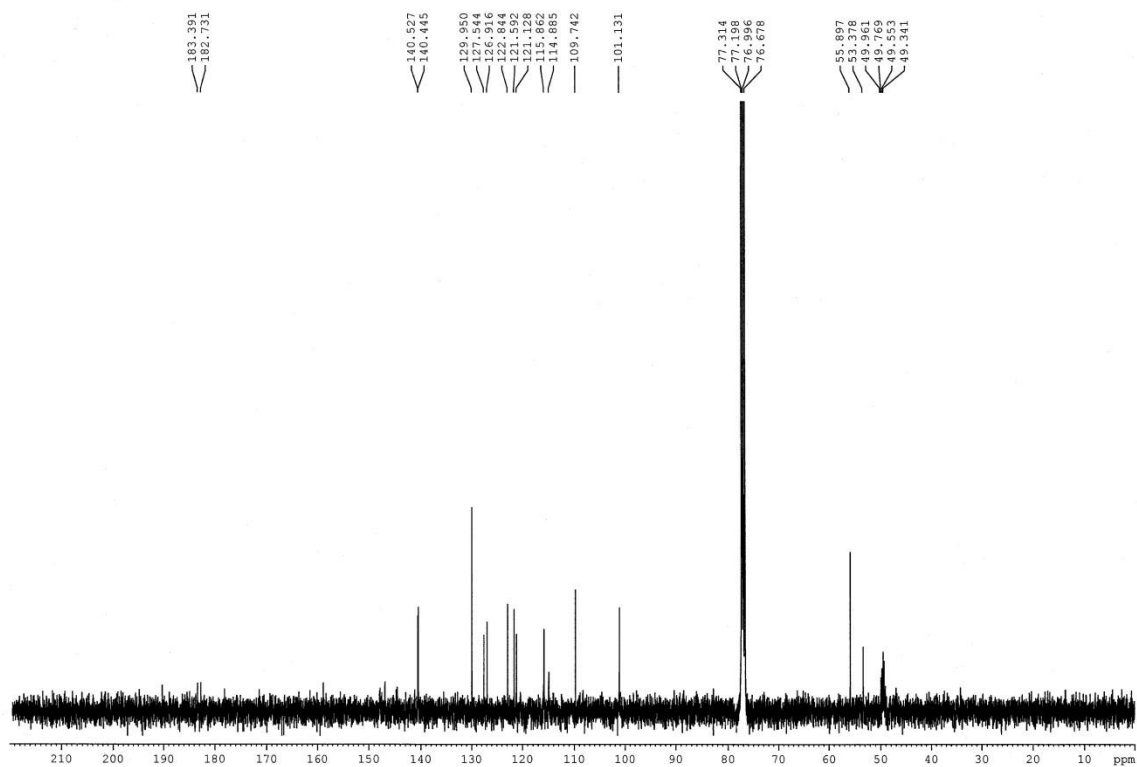

Figure S4 <sup>13</sup>C NMR spectrum of demethoxycurcumin (**2**) (CDCl<sub>3</sub>)

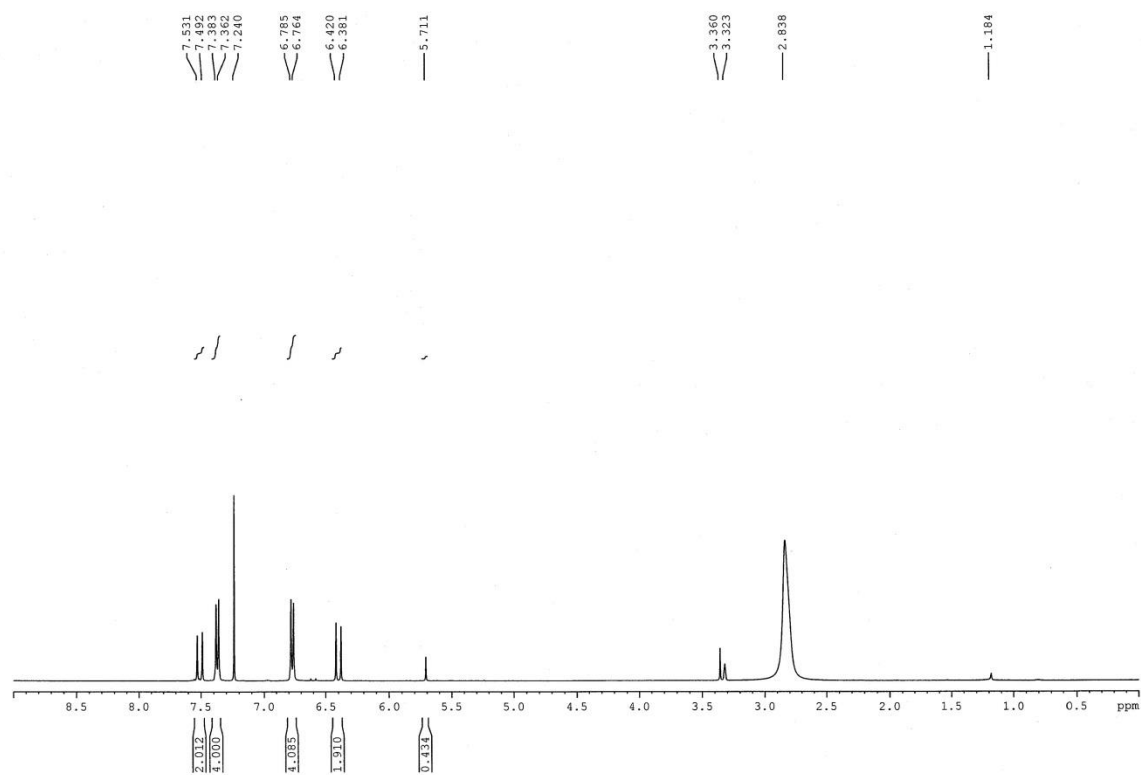

Figure S5 <sup>1</sup>H NMR spectrum of bisdemethoxycurcumin (**3**) (CDCl<sub>3</sub>+10 drops of CD<sub>3</sub>OD)

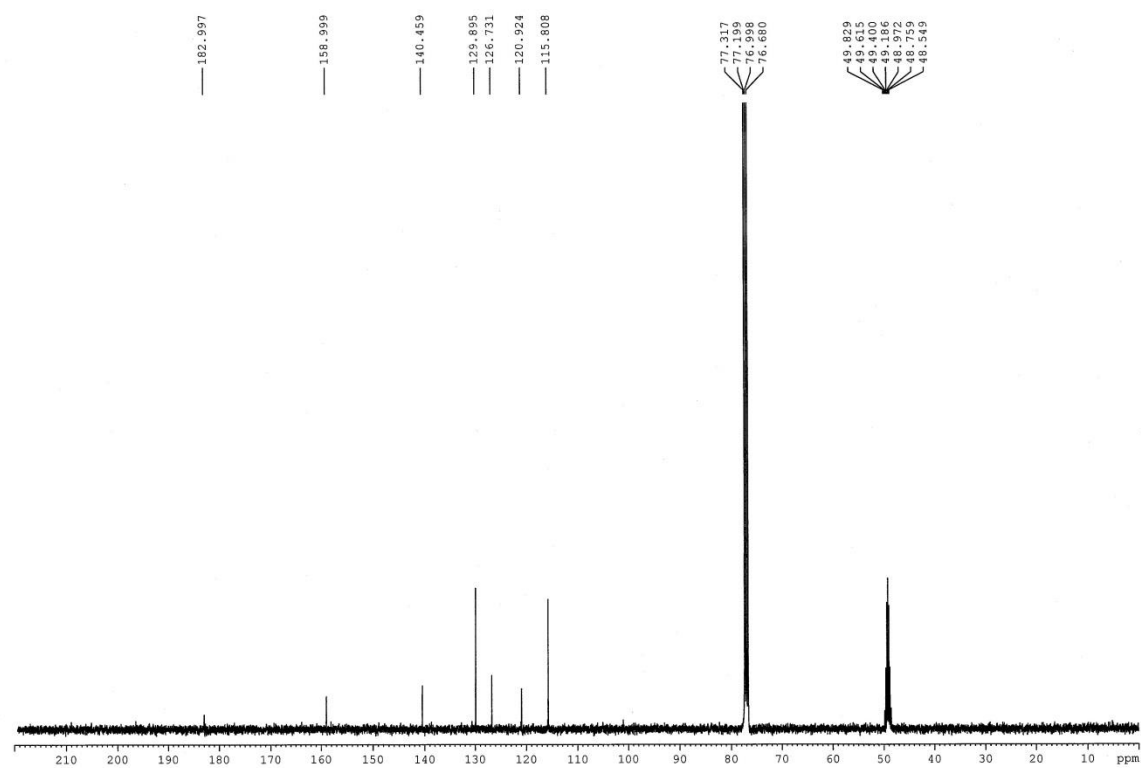

Figure S6 <sup>13</sup>C NMR spectrum of bisdemethoxycurcumin (**3**) (CDCl<sub>3</sub>+10 drops of CD<sub>3</sub>OD)

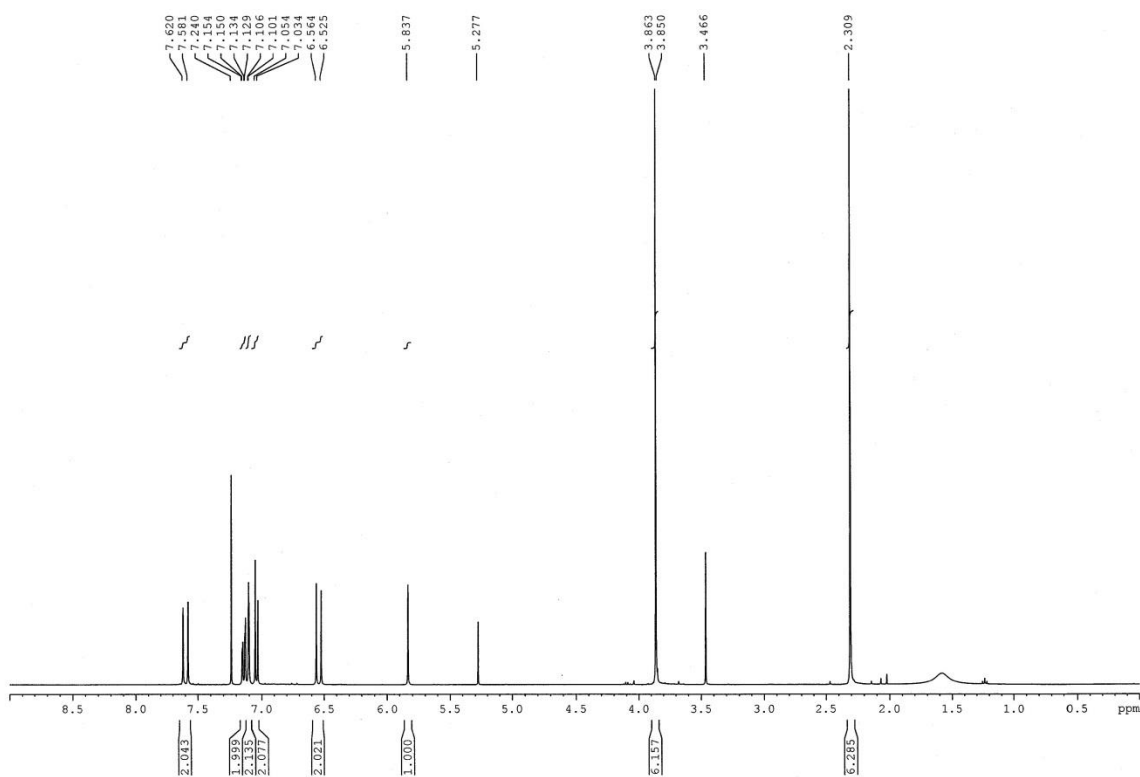

Figure S7 <sup>1</sup>H NMR spectrum of di-*O*-acetylcurcumin (**4**) (CDCl<sub>3</sub>)

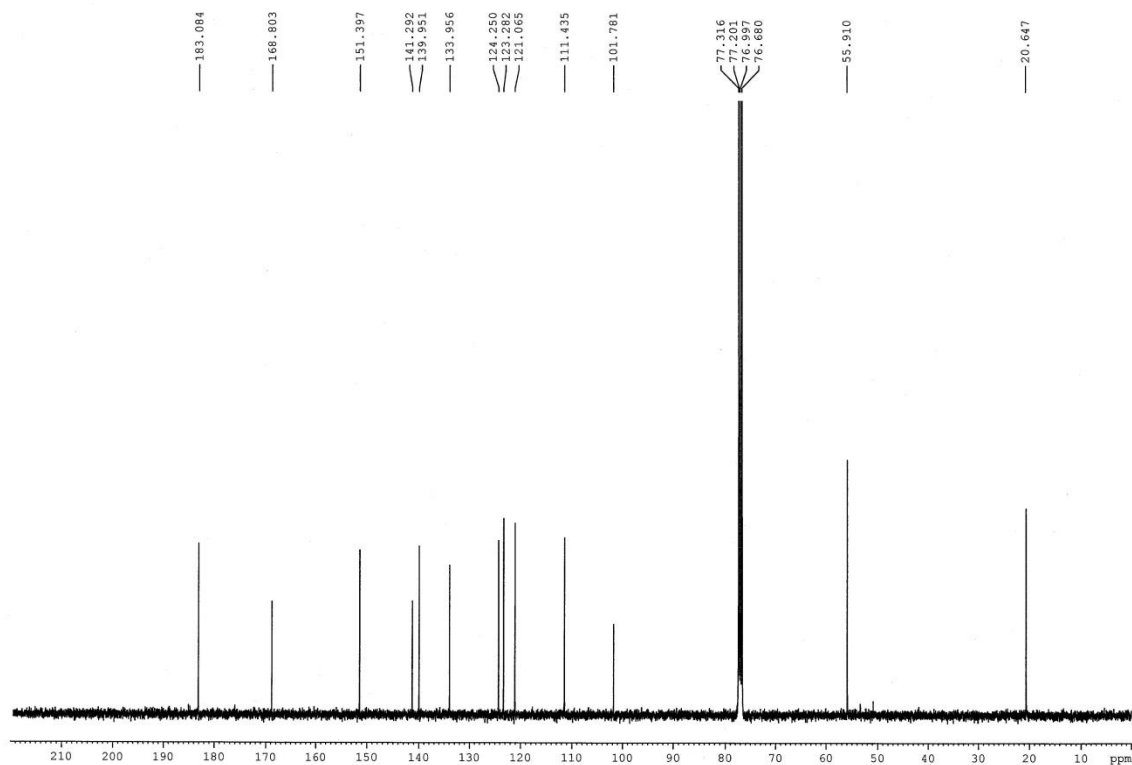

Figure S8 <sup>13</sup>C NMR spectrum of di-*O*-acetylcurcumin (**4**) (CDCl<sub>3</sub>)

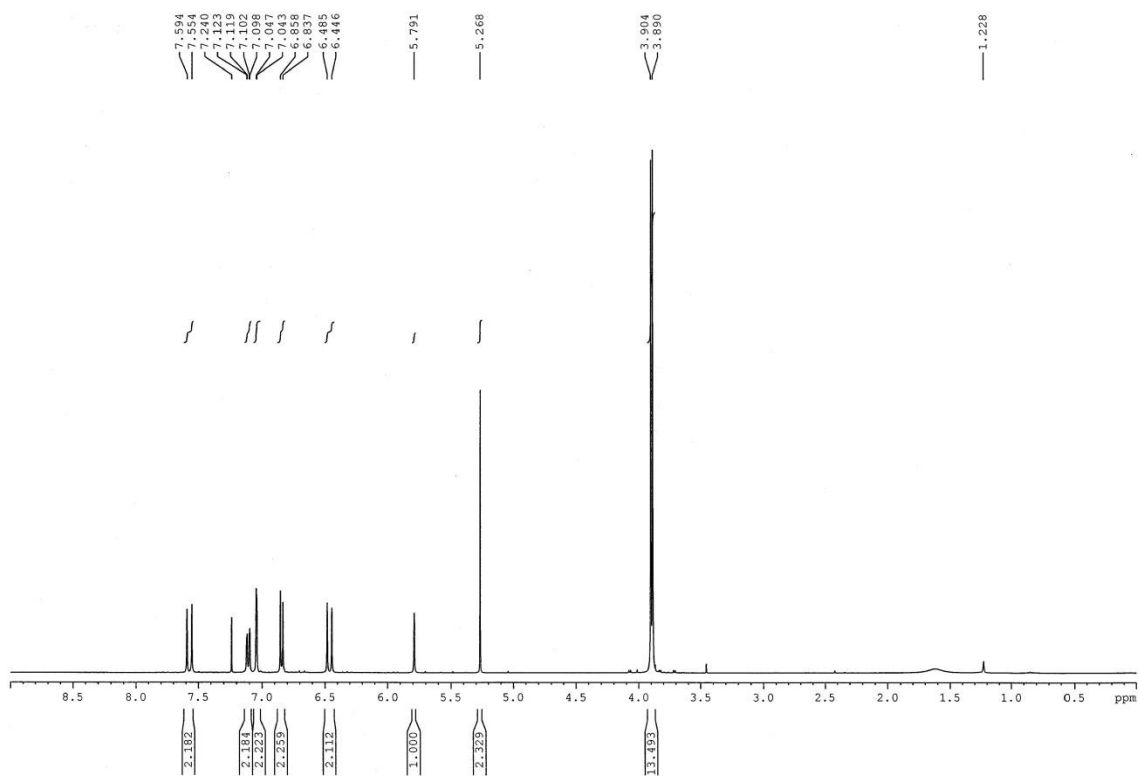

Figure S9 <sup>1</sup>H NMR spectrum of di-*O*-methylcurcumin (**5**) (CDCl<sub>3</sub>)

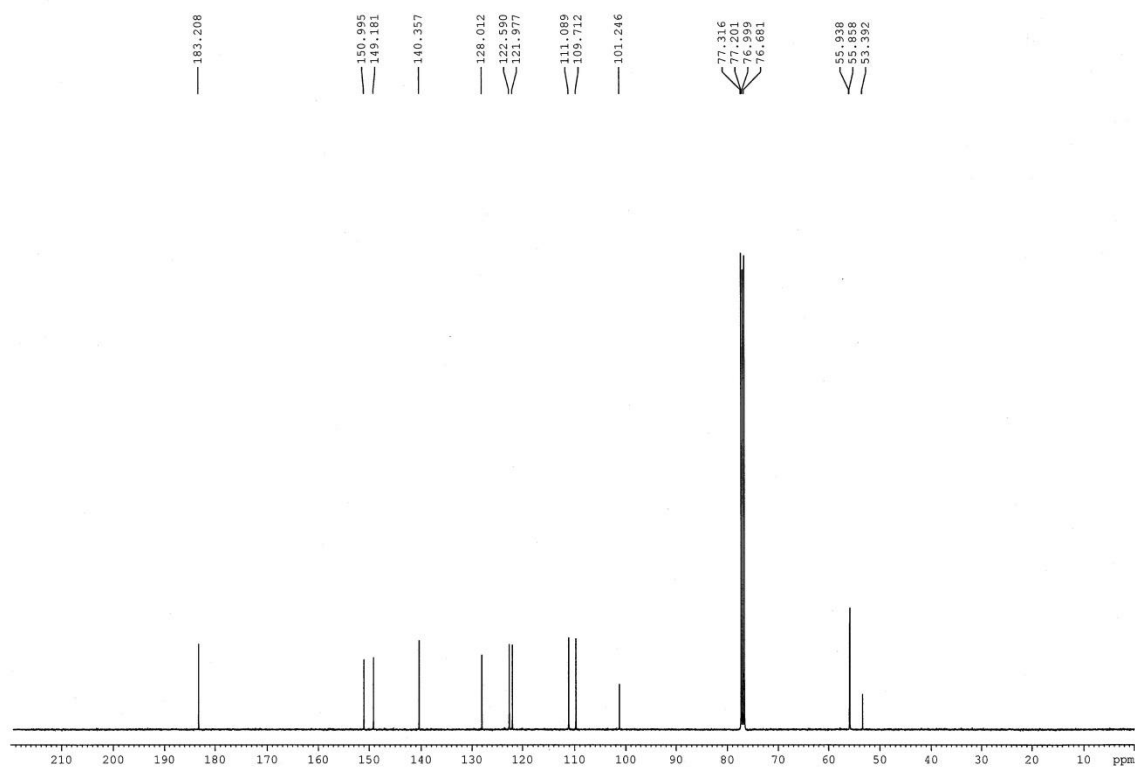

Figure S10 <sup>13</sup>C NMR spectrum of di-*O*-methylcurcumin (**5**) (CDCl<sub>3</sub>)

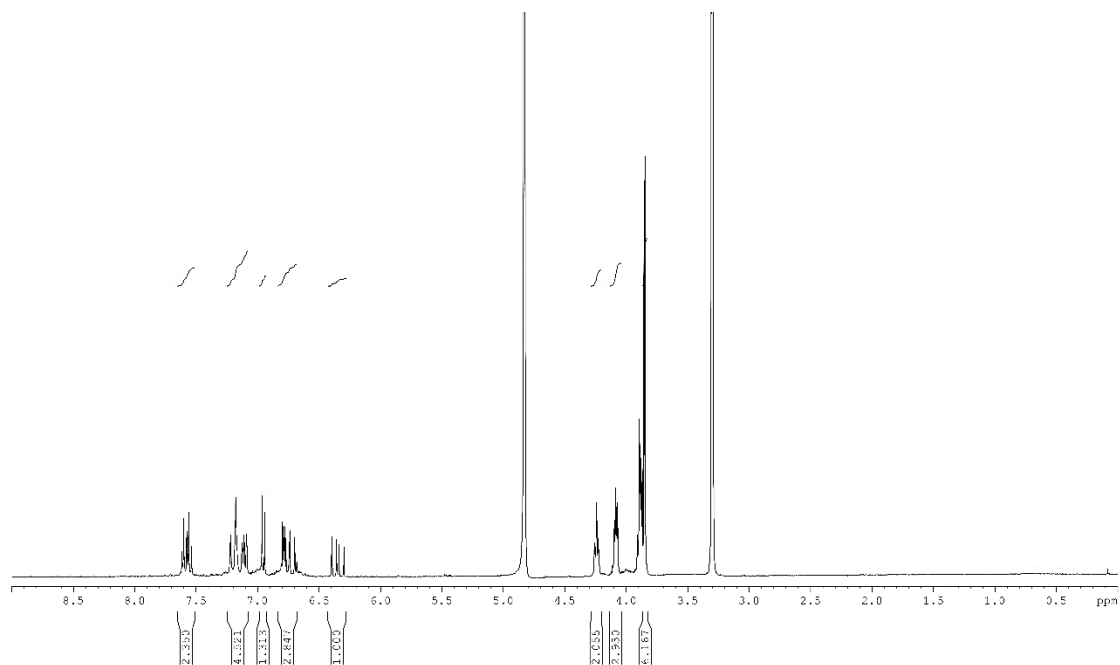

Figure S11 <sup>1</sup>H NMR spectrum of di-*O*-(2-hydroxyethyl)curcumin (**6**) (CD<sub>3</sub>OD)

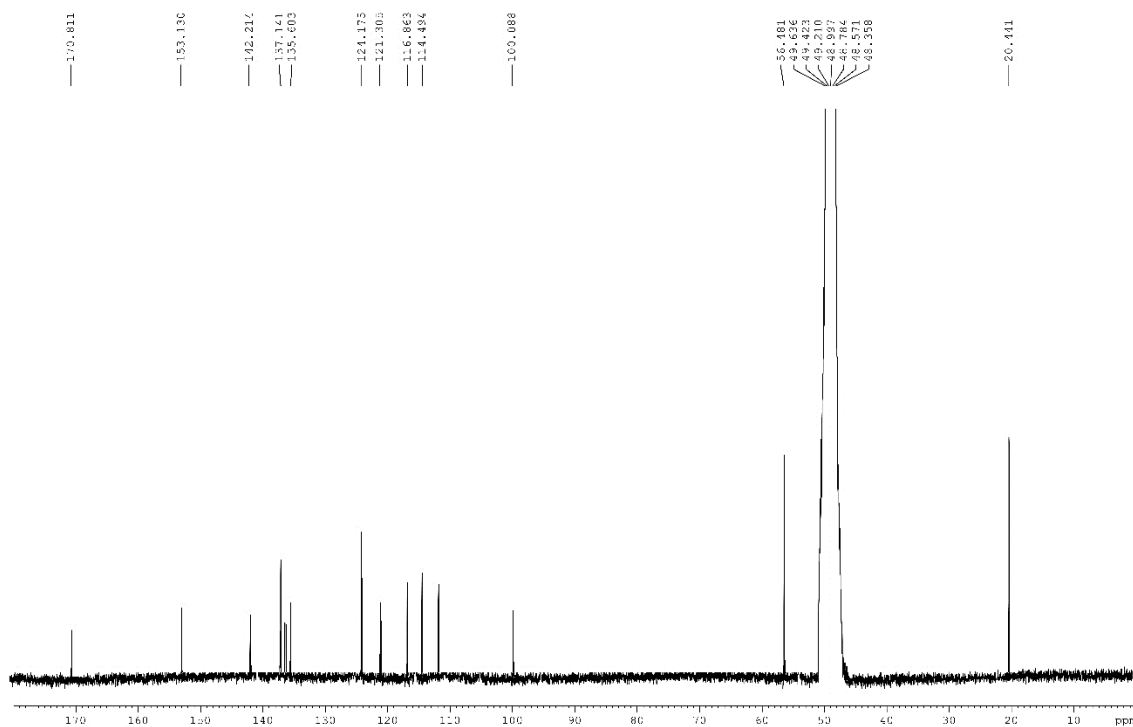

Figure S12 <sup>13</sup>C NMR spectrum of di-*O*-(2-hydroxyethyl)curcumin (**6**) (CD<sub>3</sub>OD)

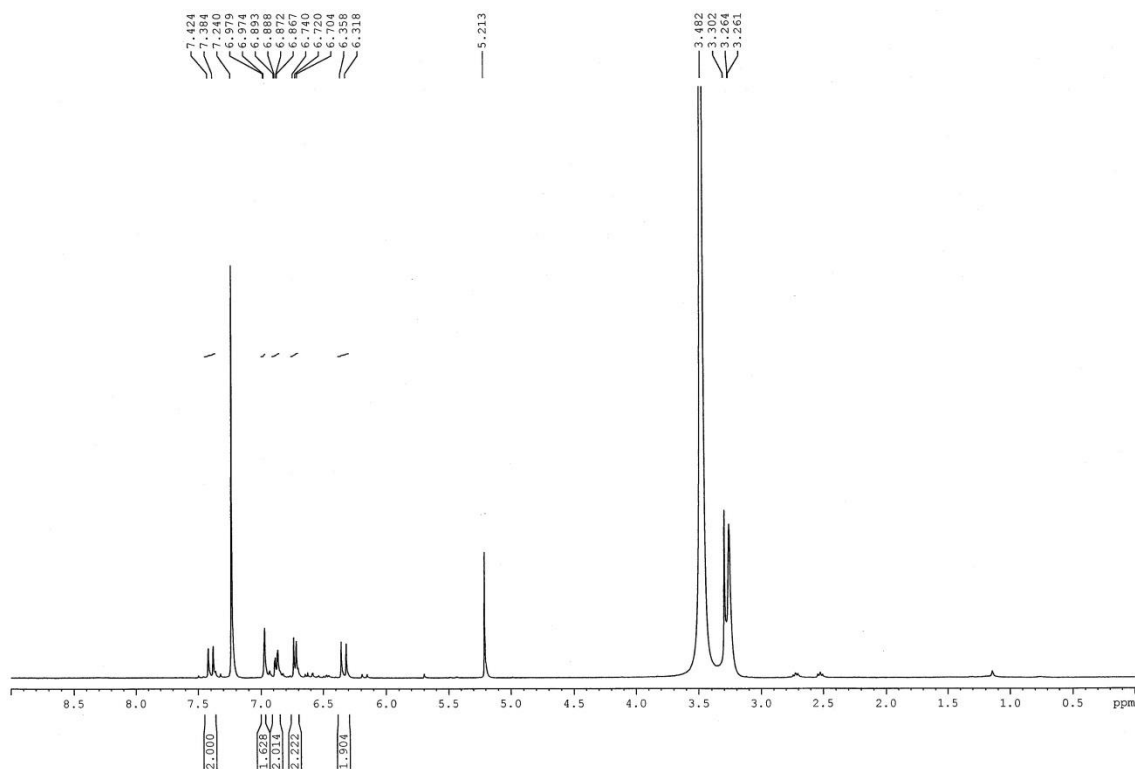

Figure S13 <sup>1</sup>H NMR spectrum of di-*O*-demethylcurcumin (**7**) (CDCl<sub>3</sub>+10 drops of CD<sub>3</sub>OD)

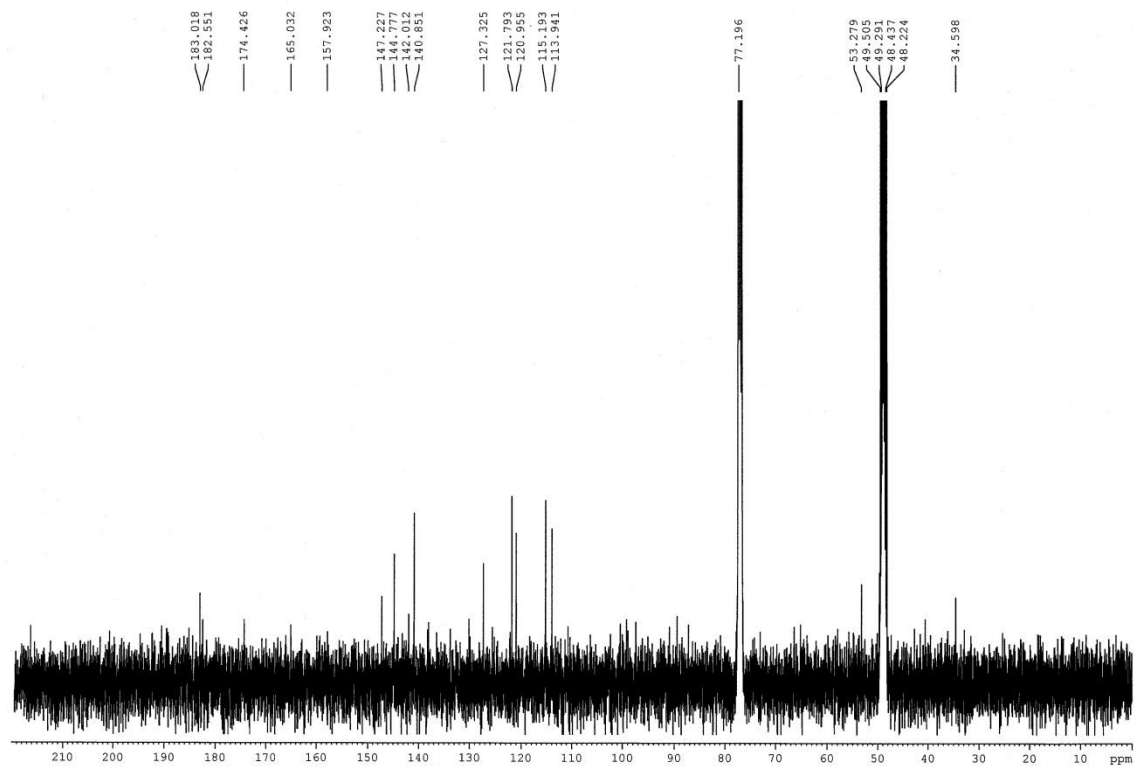

Figure S14 <sup>13</sup>C NMR spectrum of di-*O*-demethylcurcumin (**7**) (CDCl<sub>3</sub>+10 drops of CD<sub>3</sub>OD)

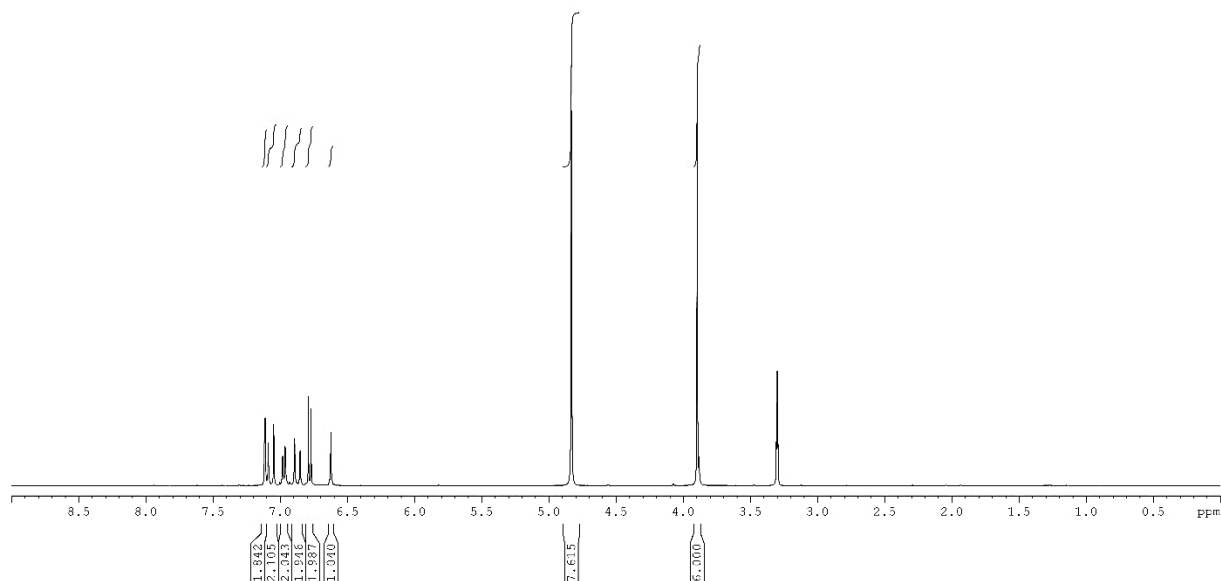

Figure S15 <sup>1</sup>H NMR spectrum of curcumin pyrazole (**8**) (CD<sub>3</sub>OD)

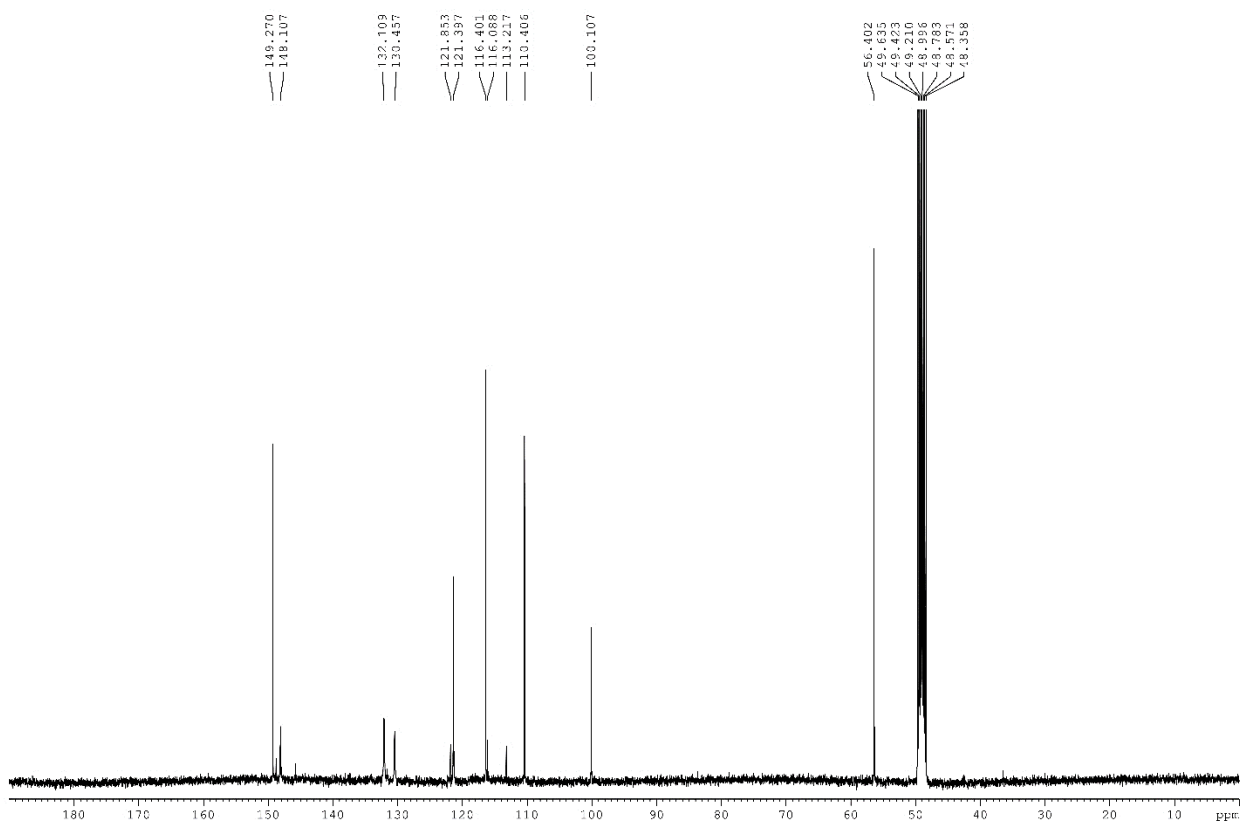

Figure S16 <sup>13</sup>C NMR spectrum of curcumin pyrazole (**8**) (CD<sub>3</sub>OD)

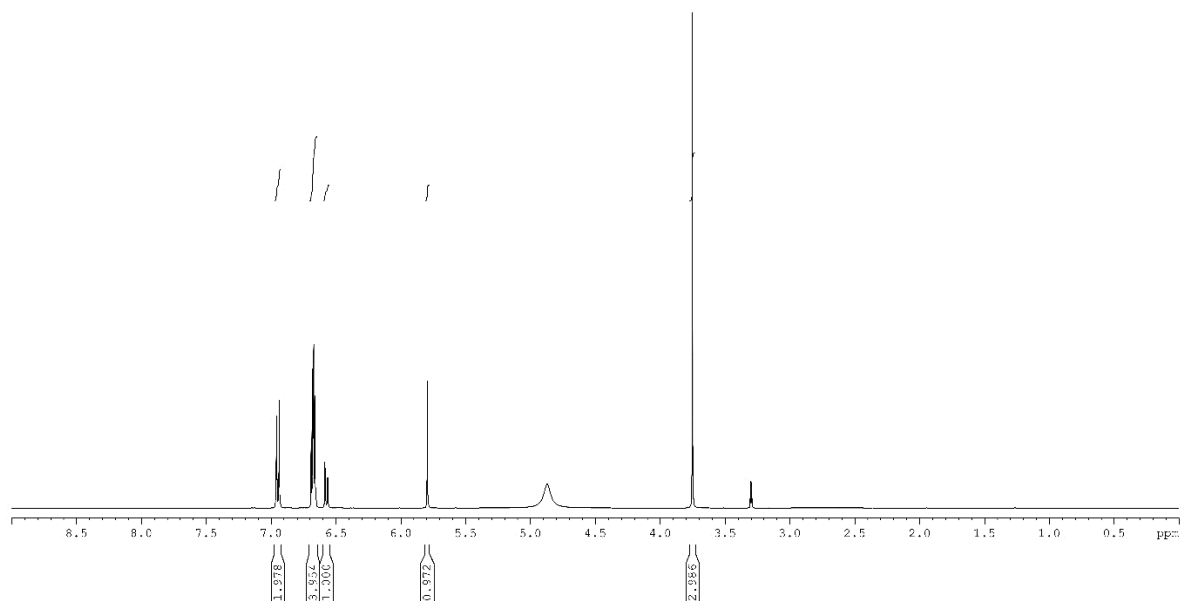

Figure S17 <sup>1</sup>H NMR spectrum of demethoxycurcumin pyrazole (**9**) (CD<sub>3</sub>OD)

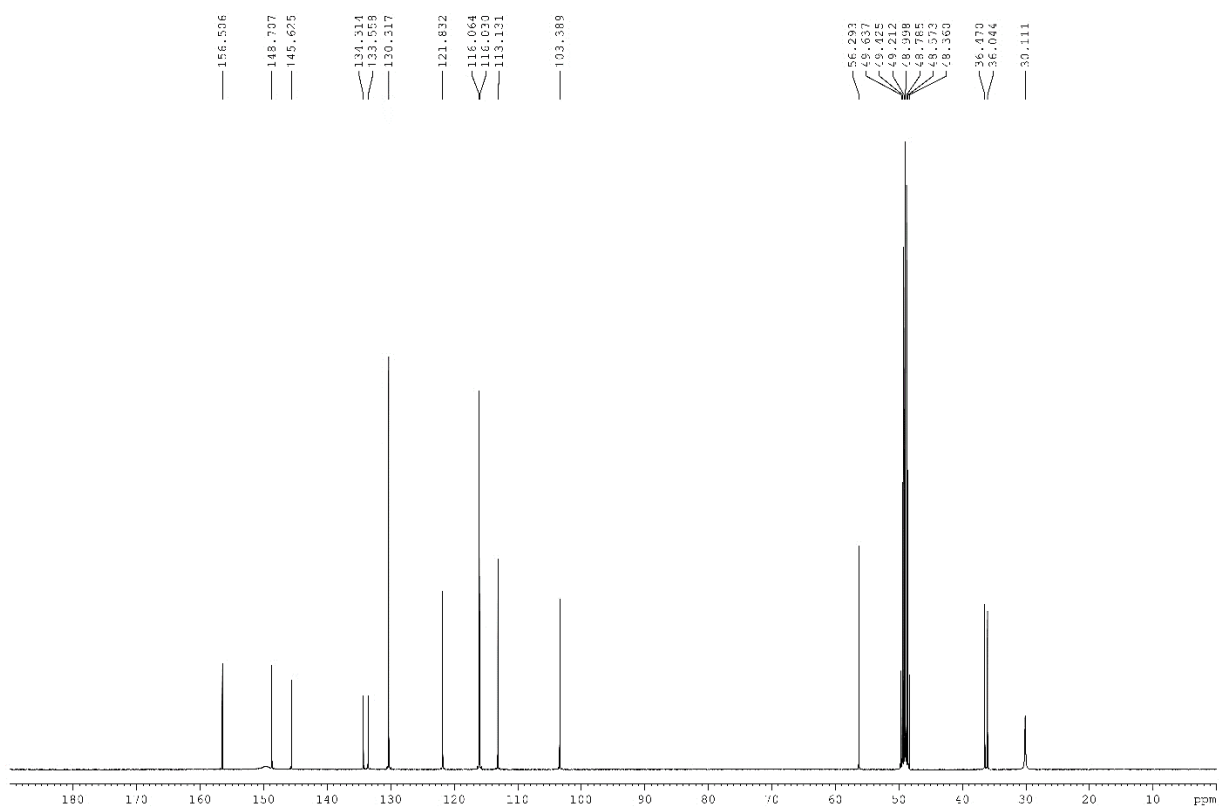

Figure S18 <sup>13</sup>C NMR spectrum of demethoxycurcumin pyrazole (**9**) (CD<sub>3</sub>OD)

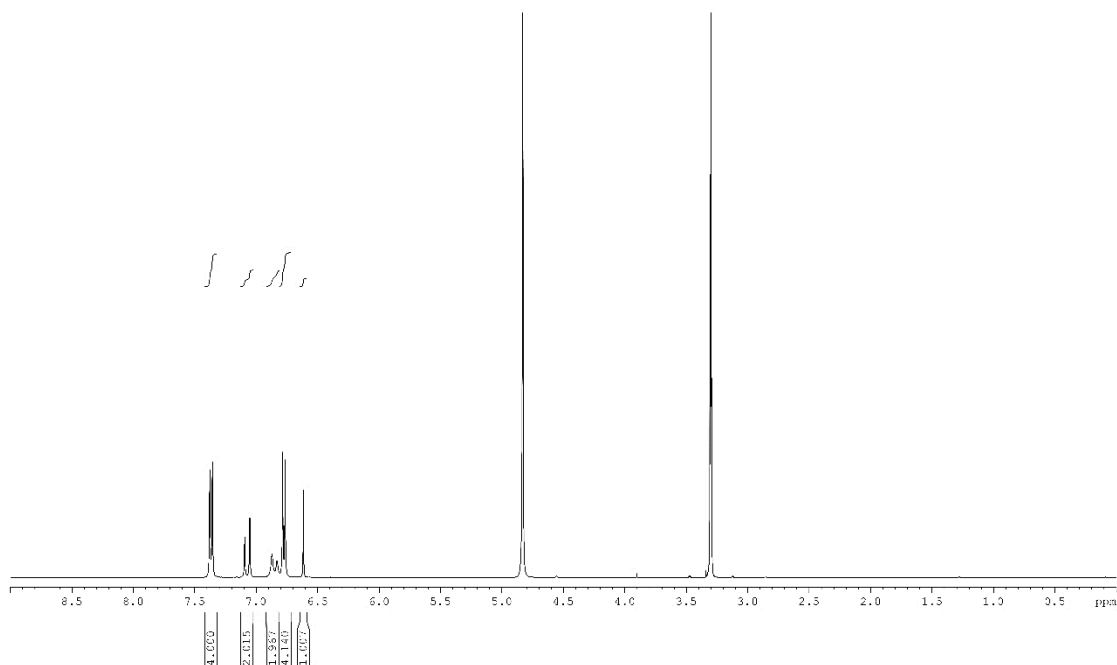

Figure S19 <sup>1</sup>H NMR spectrum of bisdemethoxycurcumin pyrazole (**10**) (CD<sub>3</sub>OD)

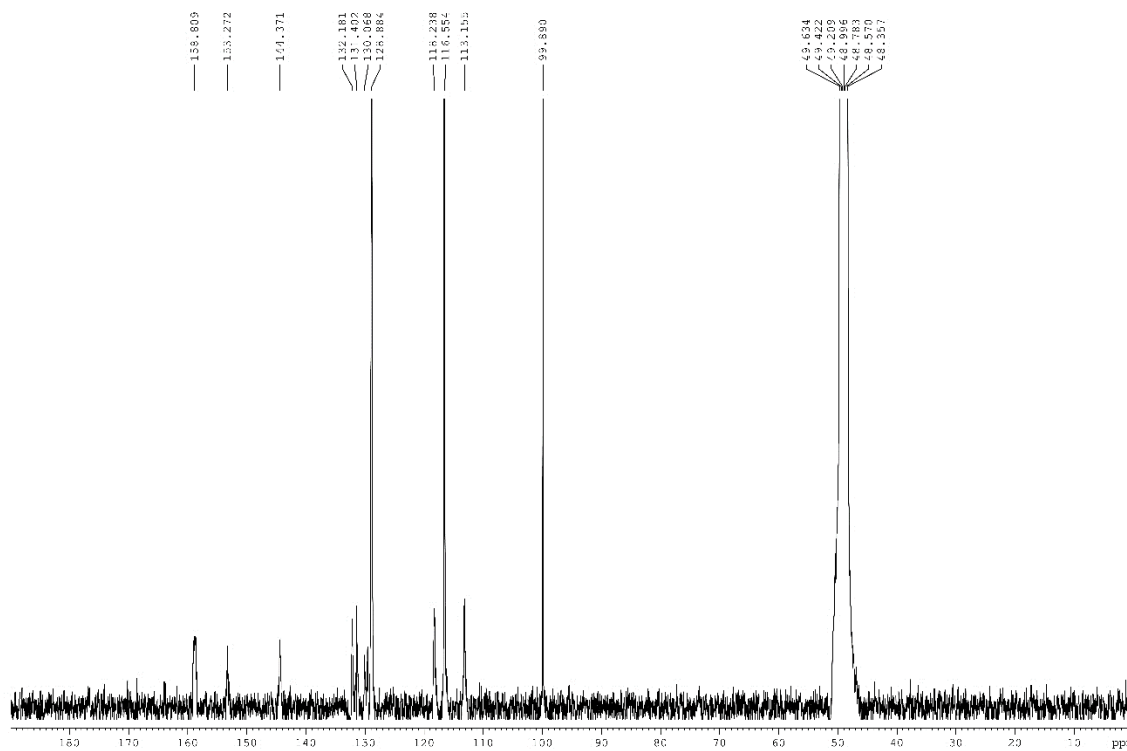

Figure S20 <sup>13</sup>C NMR spectrum of bisdemethoxycurcumin pyrazole (**10**) (CD<sub>3</sub>OD)

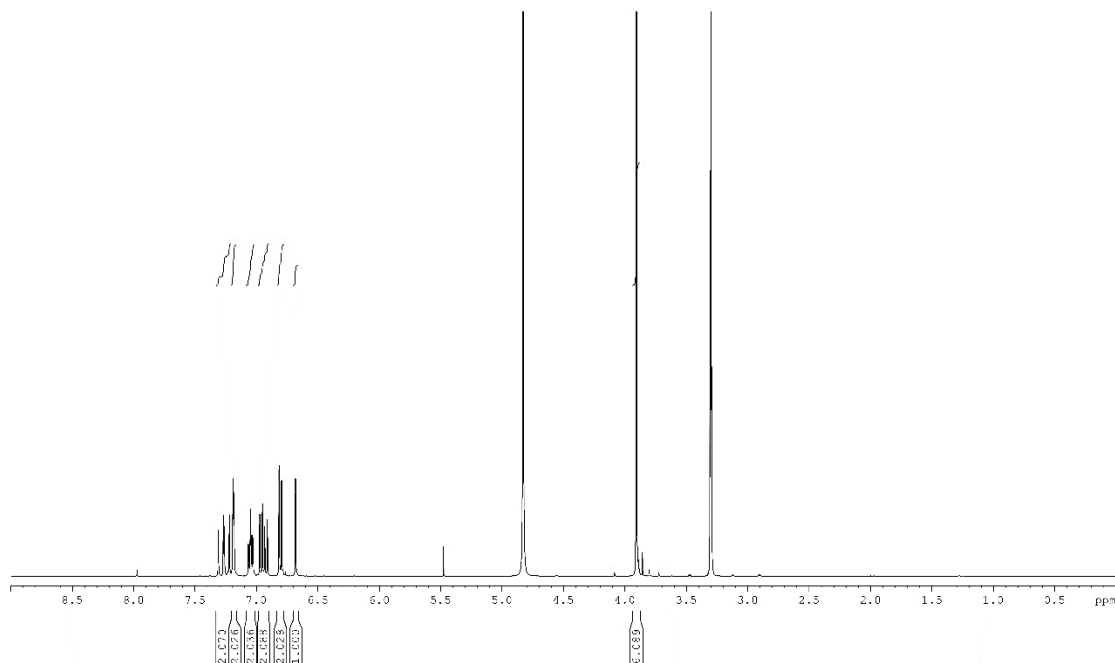

Figure S21 <sup>1</sup>H NMR spectrum of curcumin isoxazole (**11**) (CD<sub>3</sub>OD)

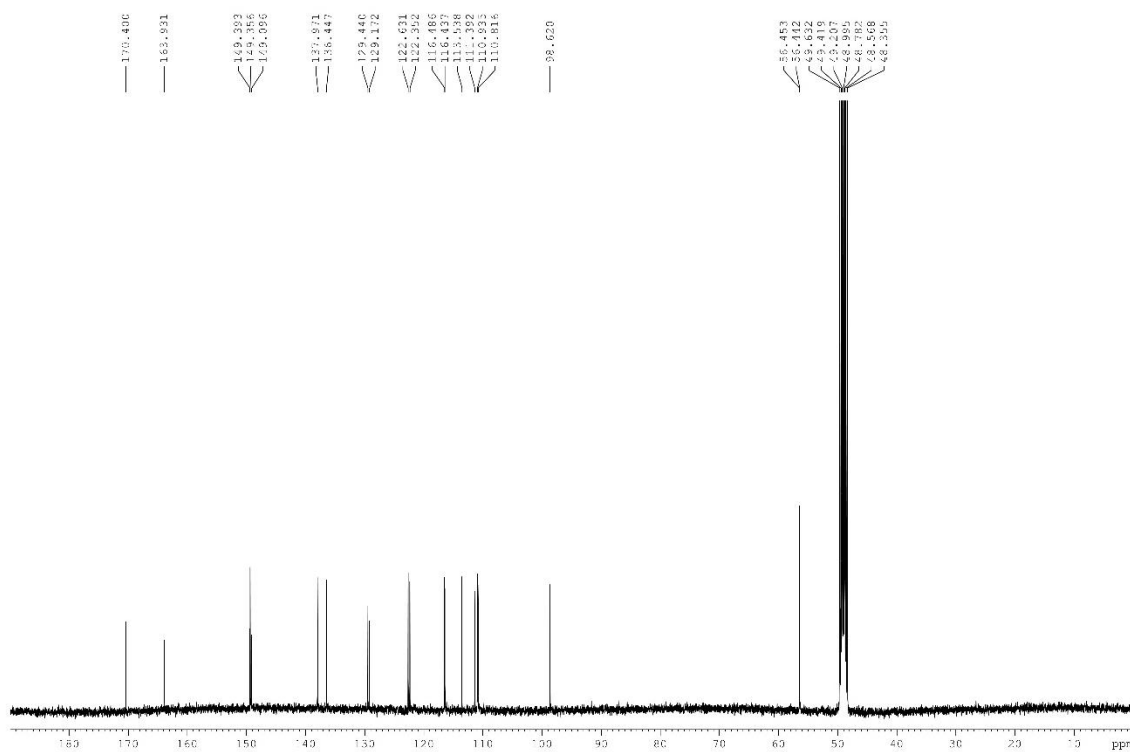

Figure S22 <sup>13</sup>C NMR spectrum of curcumin isoxazole (**11**) (CD<sub>3</sub>OD)

170.437  
163.959  
155.297  
152.187  
137.732  
136.205  
129.893  
129.671  
125.966  
125.856  
116.762  
116.698  
113.738  
111.103  
88.526  
59.637  
59.425  
59.211  
58.998  
58.786  
58.573  
58.360

Figure S24  $^{13}\text{C}$  NMR spectrum of bisdemethoxycurcumin isoxazole (**12**) ( $\text{CD}_3\text{OD}$ )

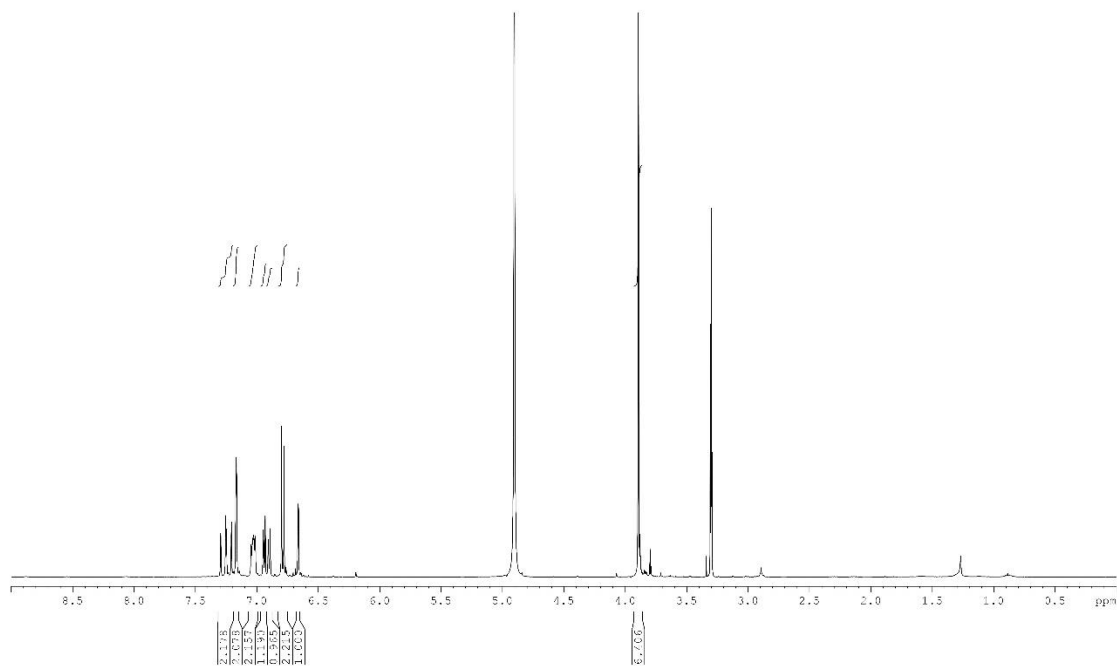

Figure S25 <sup>1</sup>H NMR spectrum of di-*O*-methylcurcumin isoxazole (**13**) (CD<sub>3</sub>OD)

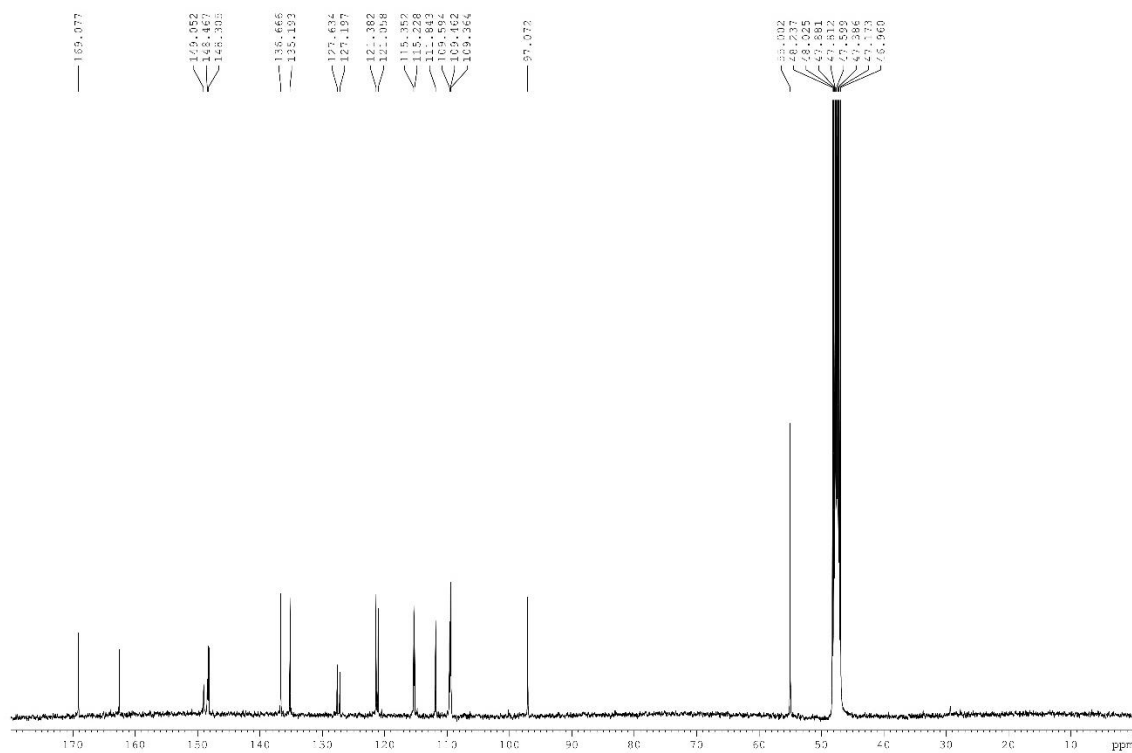

Figure S26 <sup>13</sup>C NMR spectrum of di-*O*-methylcurcumin isoxazole (**13**) (CD<sub>3</sub>OD)

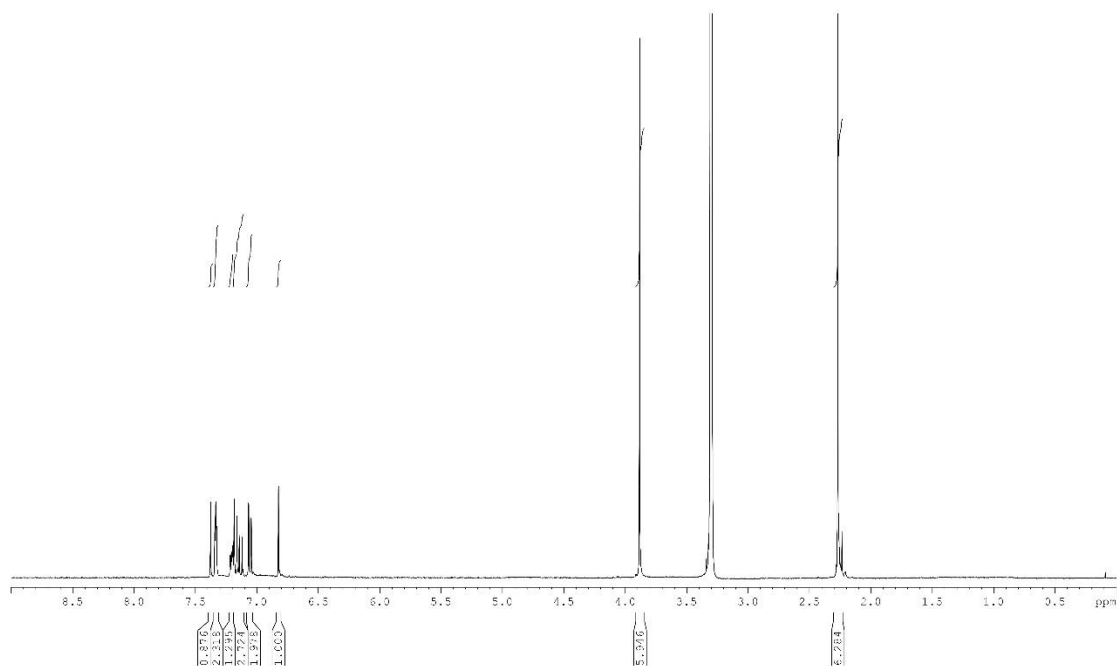

Figure S27 <sup>1</sup>H NMR spectrum of di-*O*-acetylcurcumin isoxazole (**14**) (CD<sub>3</sub>OD)

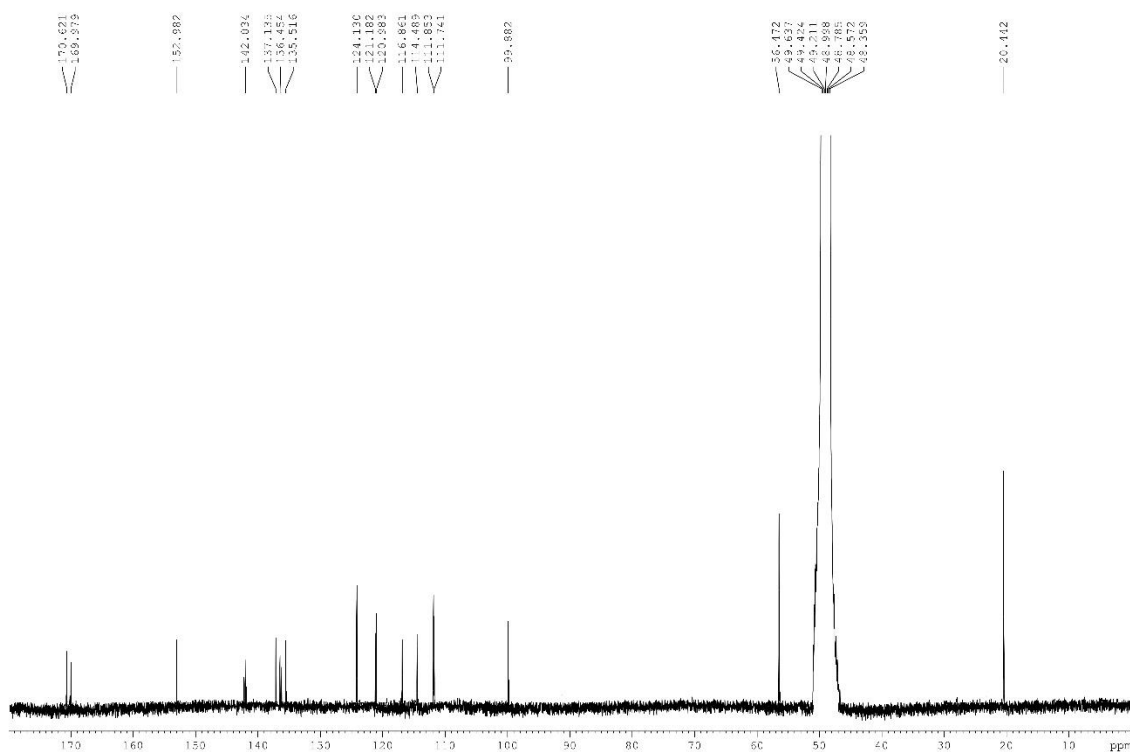

Figure S28 <sup>13</sup>C NMR spectrum of di-*O*-acetylcurcumin isoxazole (**14**) (CD<sub>3</sub>OD)

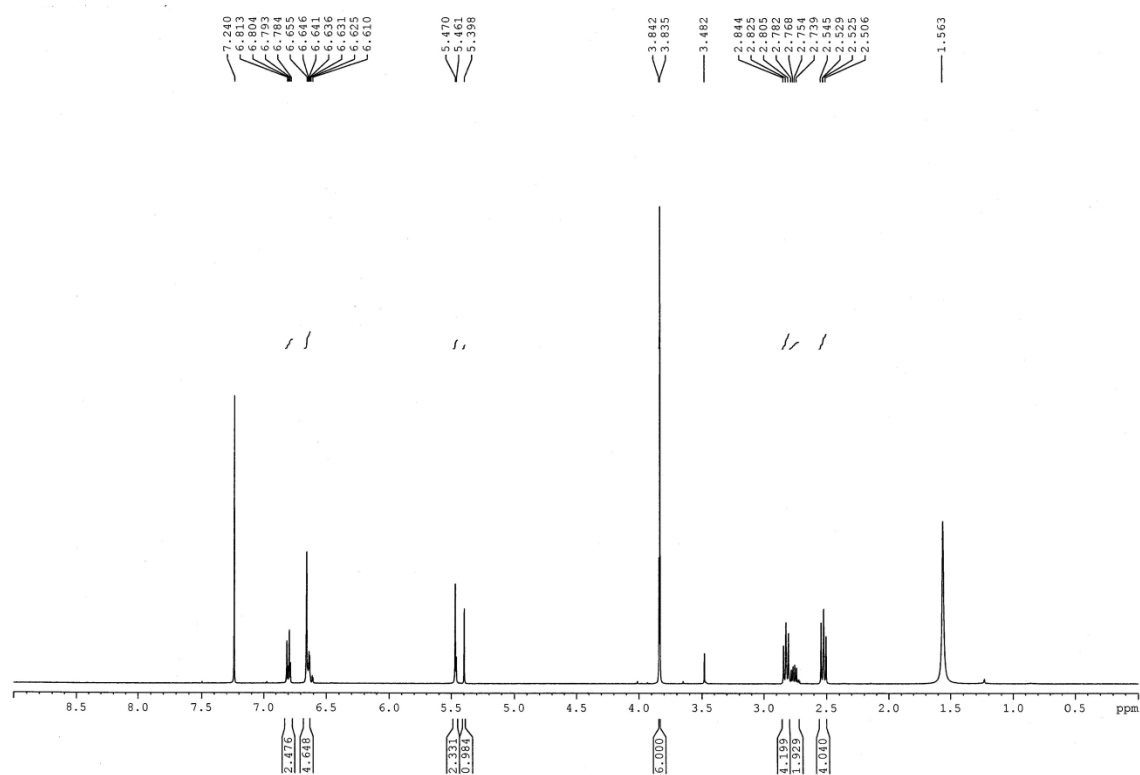

Figure S29 <sup>1</sup>H NMR spectrum of tetrahydrocurcumin (**15**) (CDCl<sub>3</sub>)

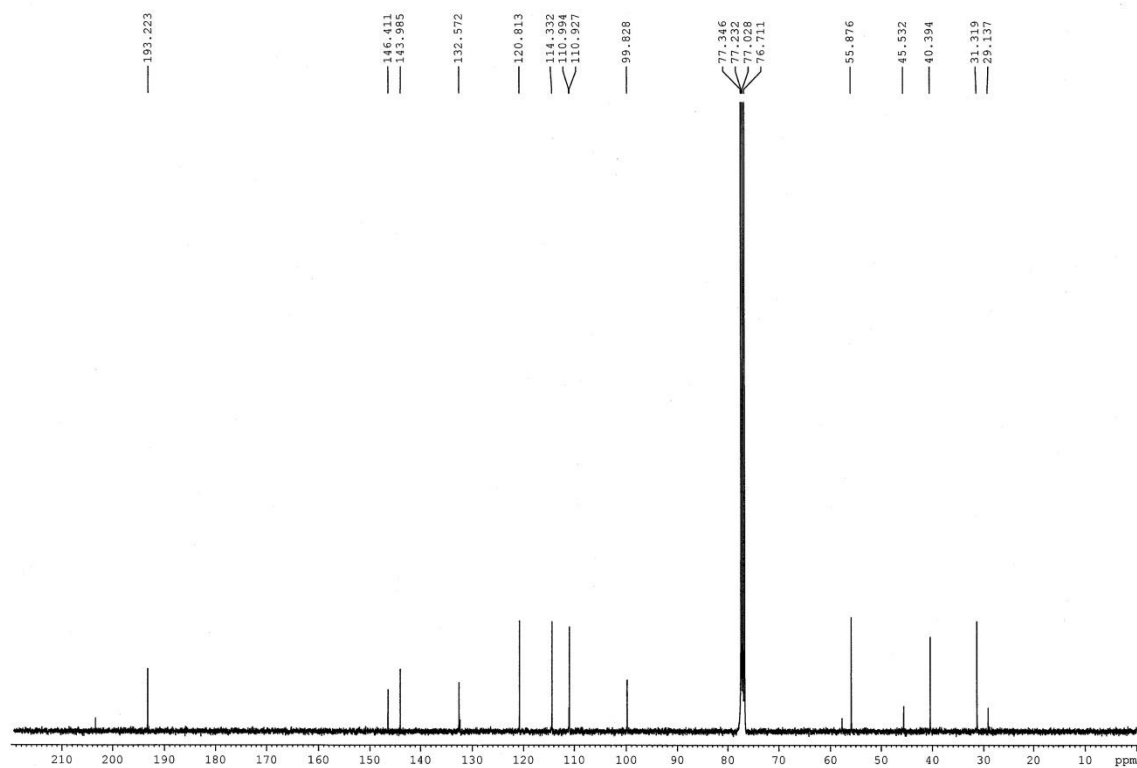

Figure S30 <sup>13</sup>C NMR spectrum of tetrahydrocurcumin (**15**) (CDCl<sub>3</sub>)

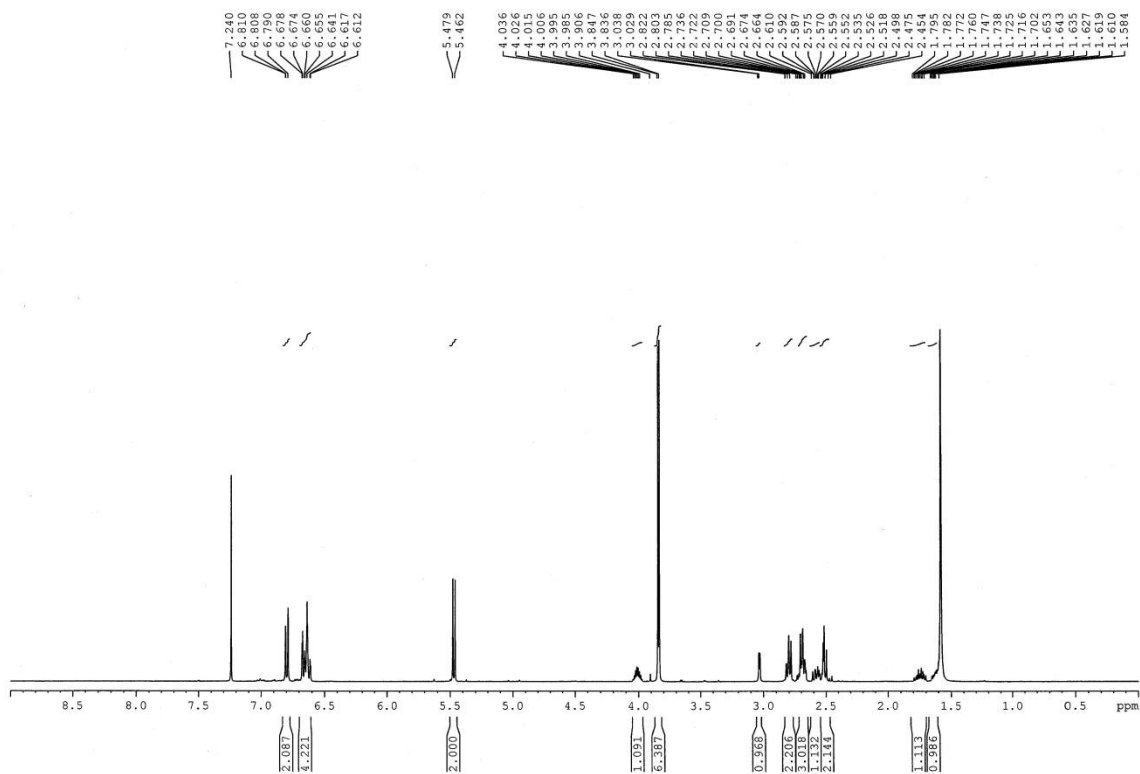

Figure S31 <sup>1</sup>H NMR spectrum of hexahydrocurcumin (**16**) (CDCl<sub>3</sub>)

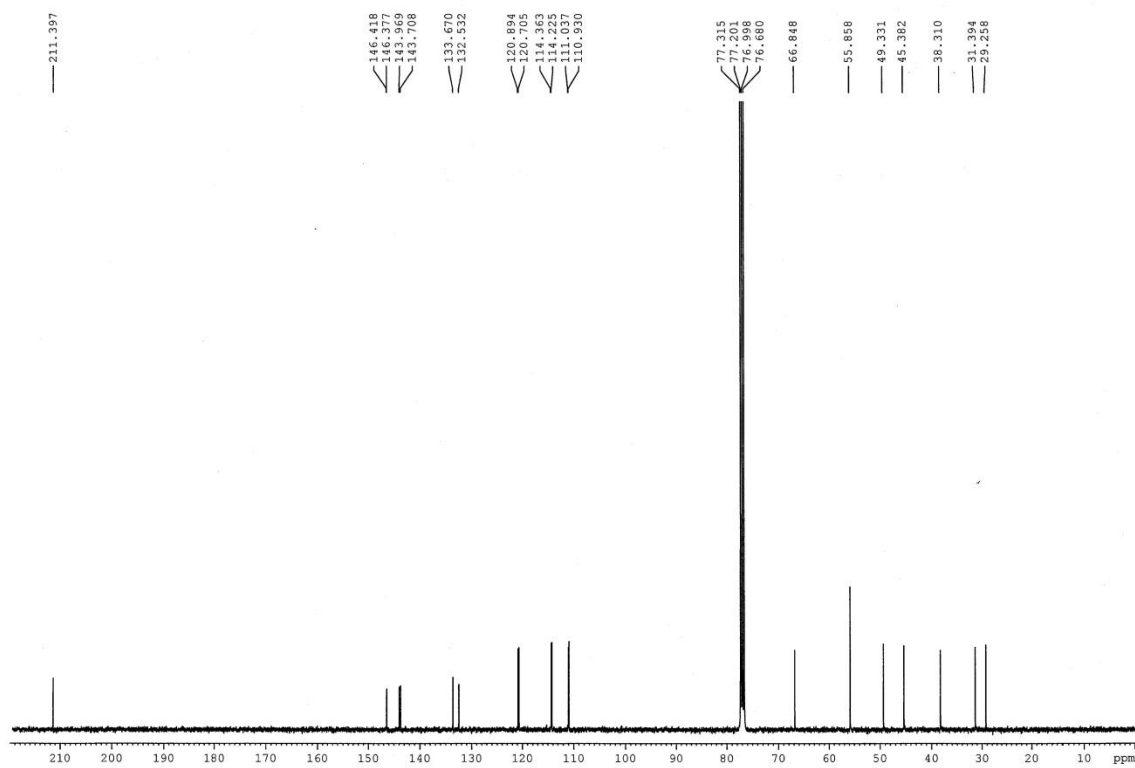

Figure S32 <sup>13</sup>C NMR spectrum of hexahydrocurcumin (**16**) (CDCl<sub>3</sub>)

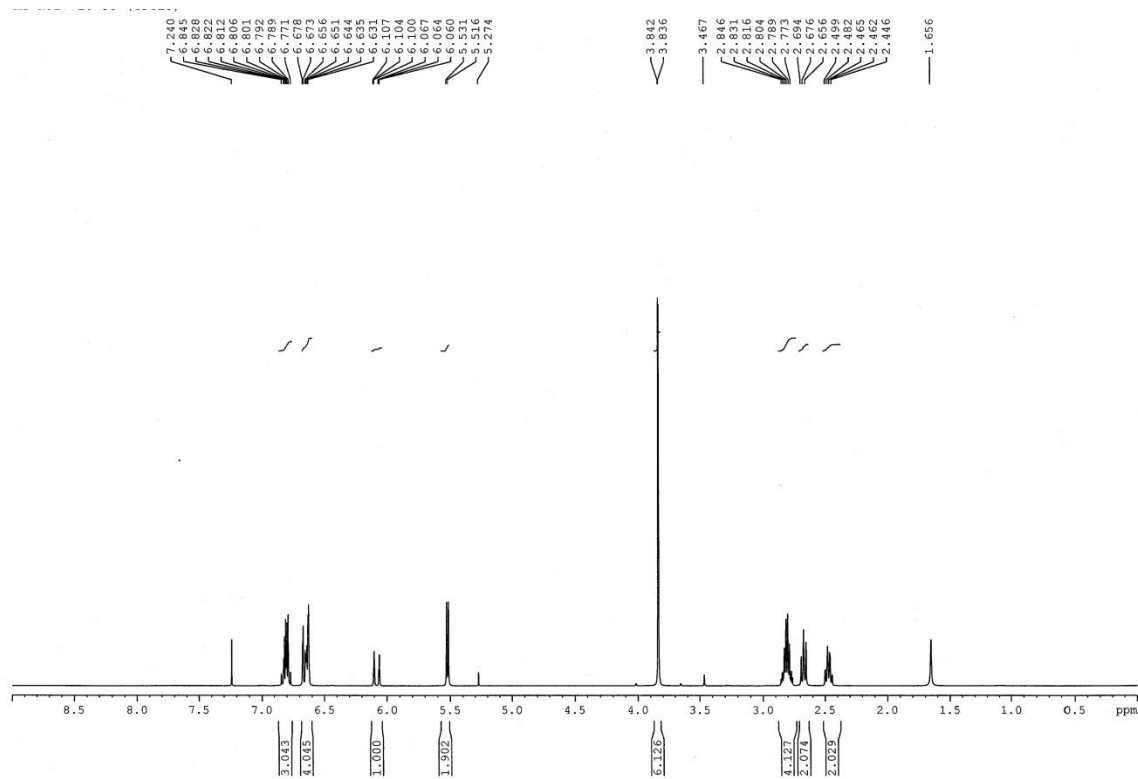

Figure S33 <sup>1</sup>H NMR spectrum of 1,7-bis(4-hydroxy-3-methoxyphenyl)hept-4-en-3-one (**17**) (CDCl<sub>3</sub>)

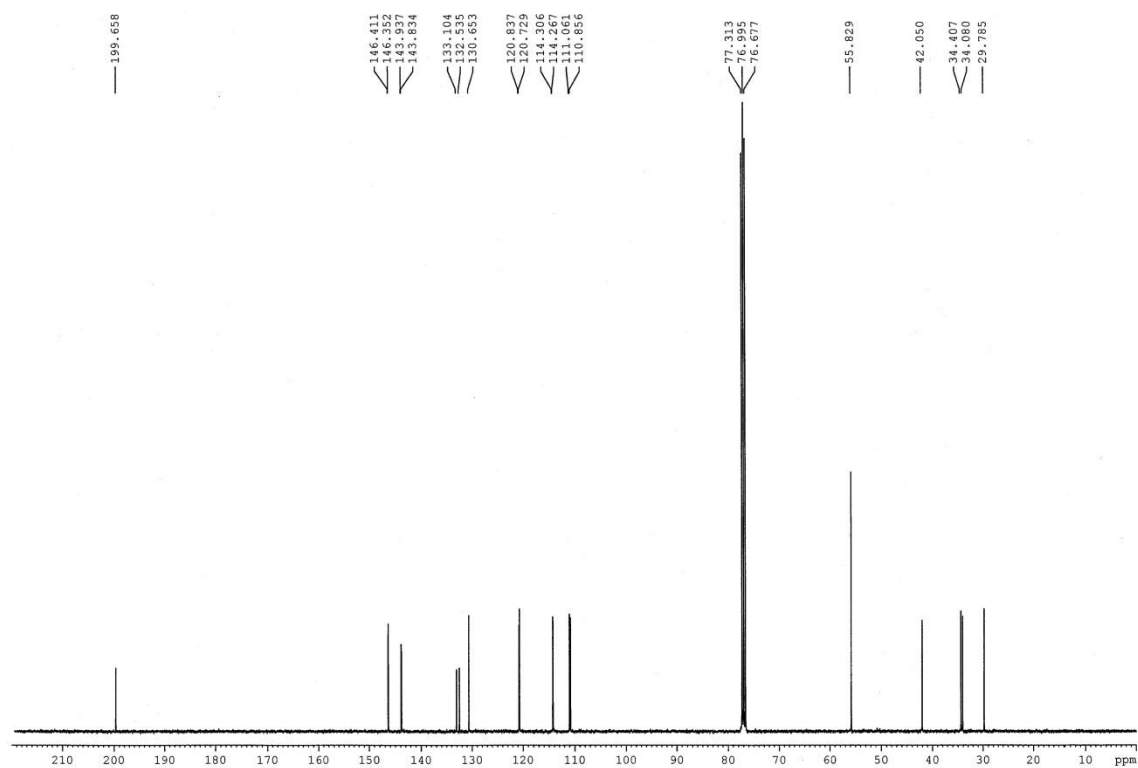

Figure S34 <sup>13</sup>C NMR spectrum of 1,7-bis(4-hydroxy-3-methoxyphenyl)hept-4-en-3-one (**17**) (CDCl<sub>3</sub>)
